# Supplementary material
Source: publisher figshare collection journal article supplement (https://frontiersin.figshare.com/ndownloader/files/32418560)
Supplement: Supplementary file [file 32418560]

## Supplementary Material

## 1 Supplementary Figures

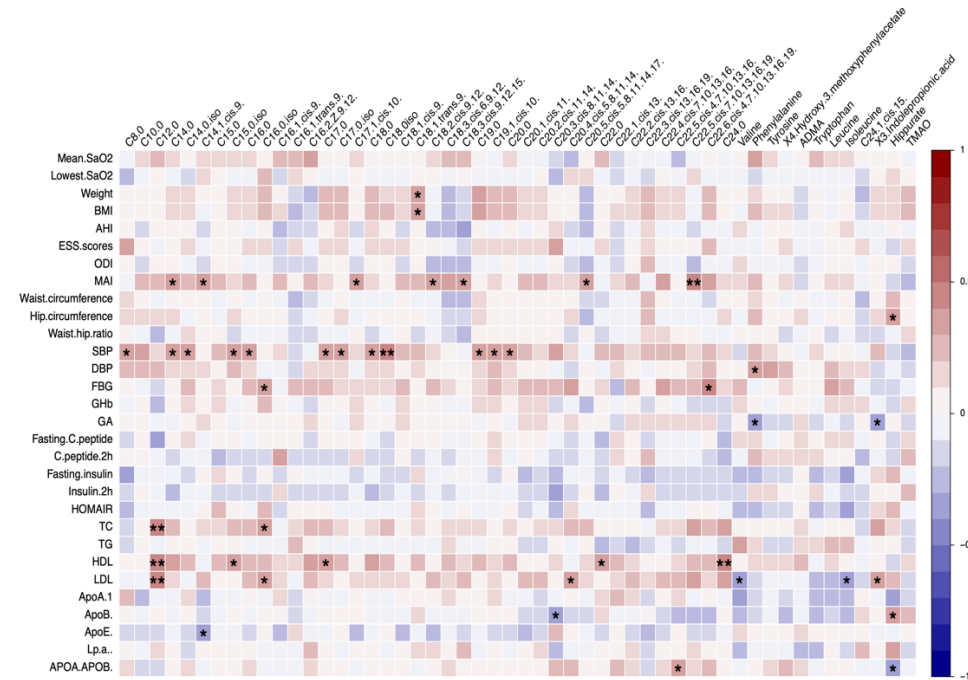

**Supplementary Figure S1.** Heatmap based on the Spearman correlation matrix demonstrated clear correlations between the clinical indicators and metabolomic profiles of all patients before and after RYGB.

Abbreviations: RYGB, Roux-en-Y gastric bypass surgery; SaO<sub>2</sub>, pulse oxygen saturation; BMI, body mass index; AHI, apnea–hypopnea index;
